# Supplementary material for: Iodine-containing radio-opaque polyphosphazenes
Source: Royal Society of Chemistry journal article supplement (doi:10.1039/c0py00126k), 2010-01-01
Supplement: c0py00126k.pdf [file c0py00126k.pdf]

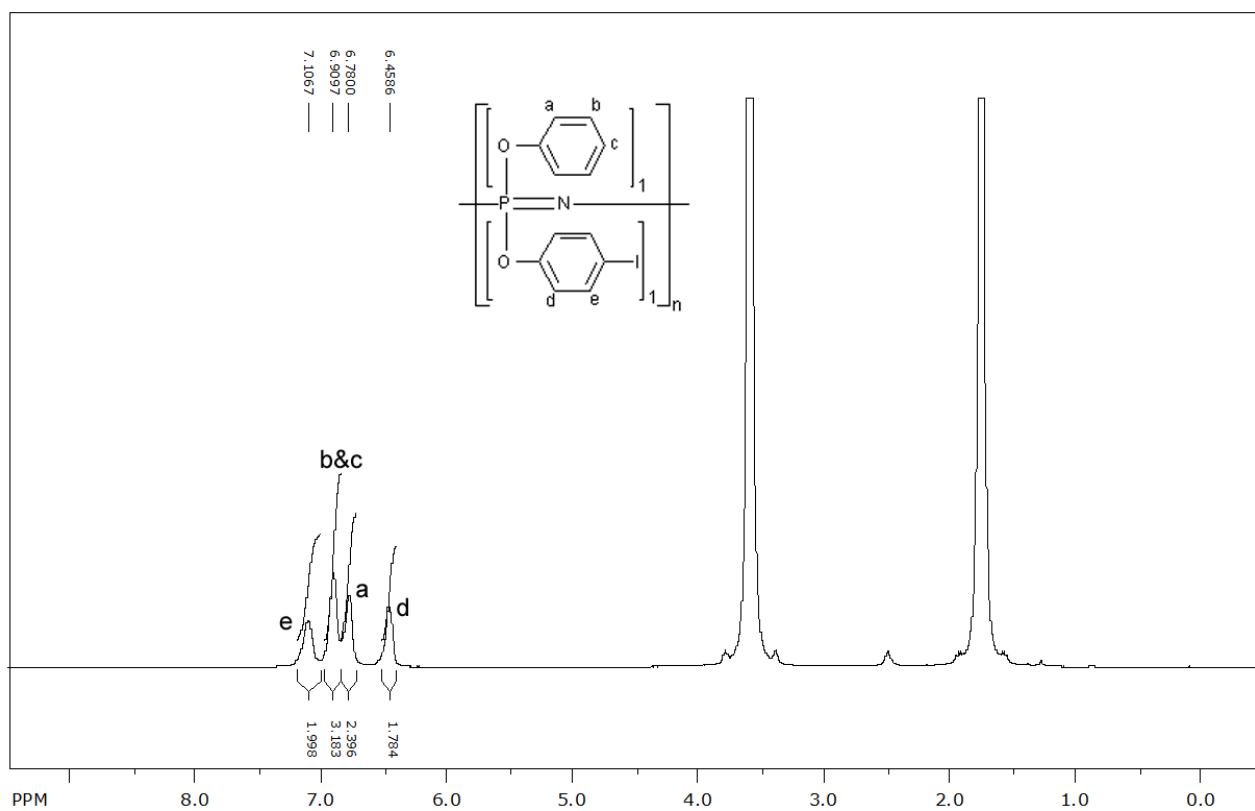

Fig. S1 <sup>1</sup>H NMR spectrum of polymer 4

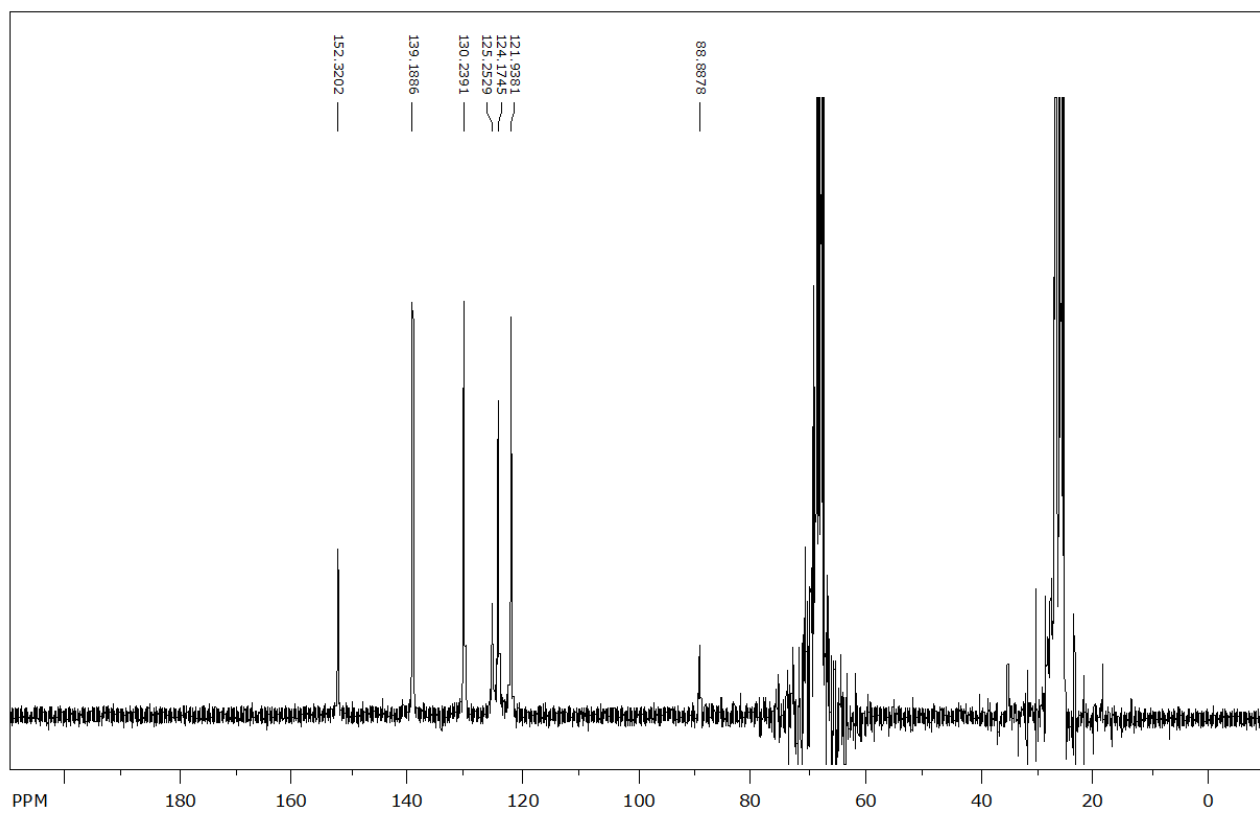

Fig. S2  $^{13}\text{C}$  NMR spectrum of polymer 4

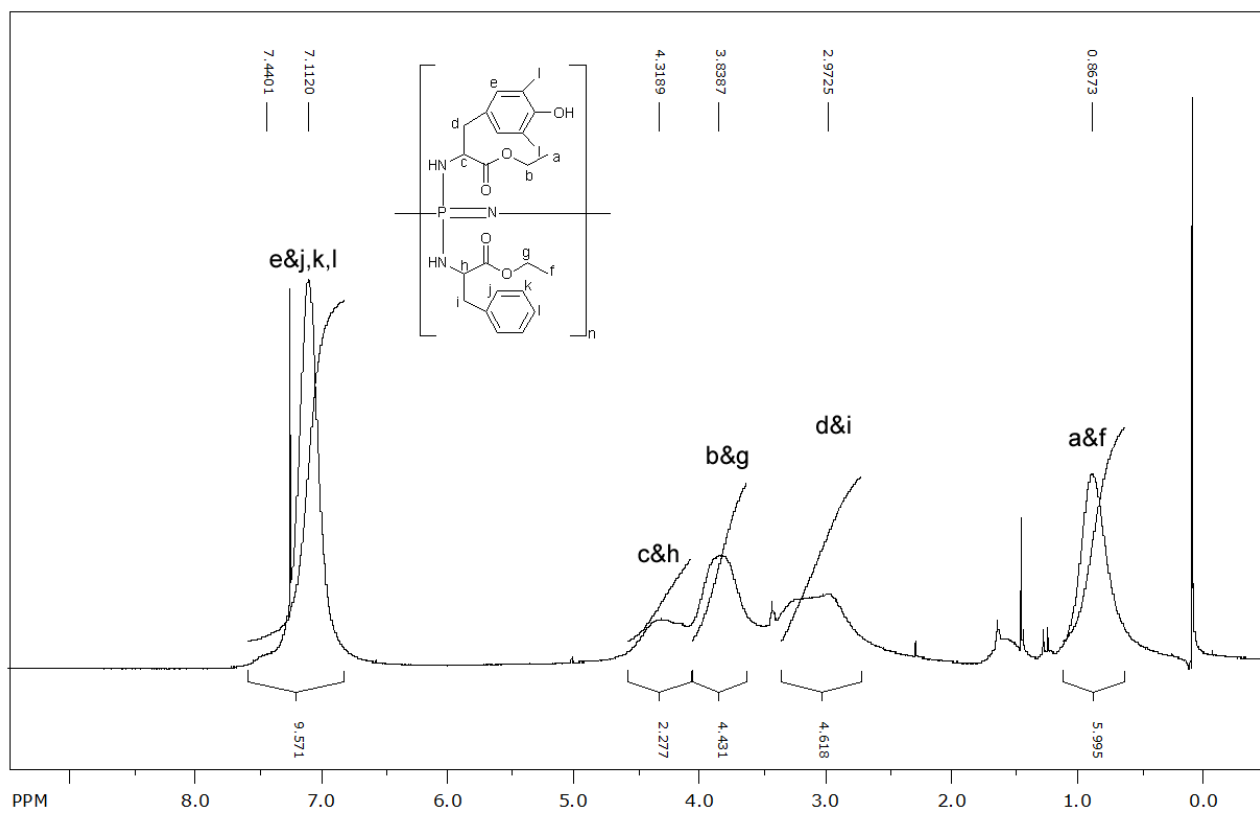

Fig. S3 <sup>1</sup>H NMR spectrum of polymer 10

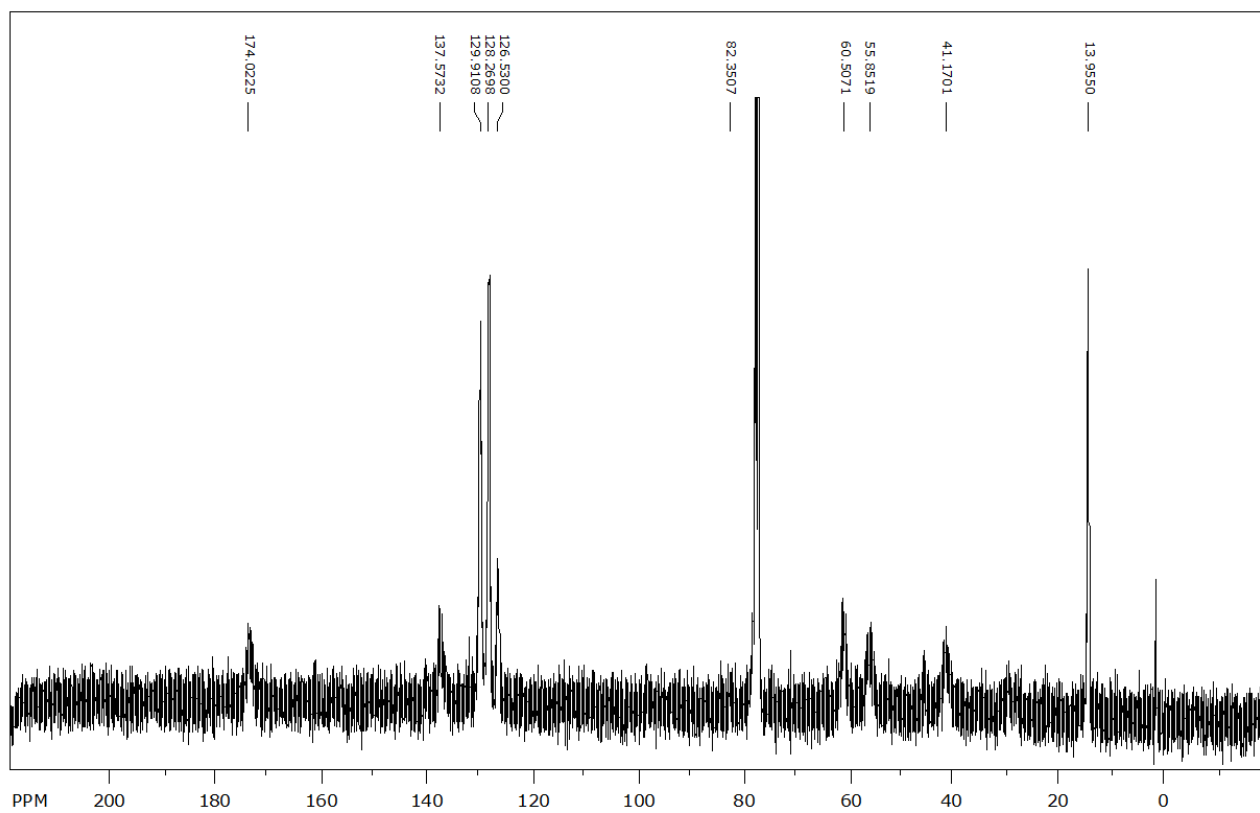

Fig. S4  $^{13}\text{C}$  NMR spectrum of polymer 10

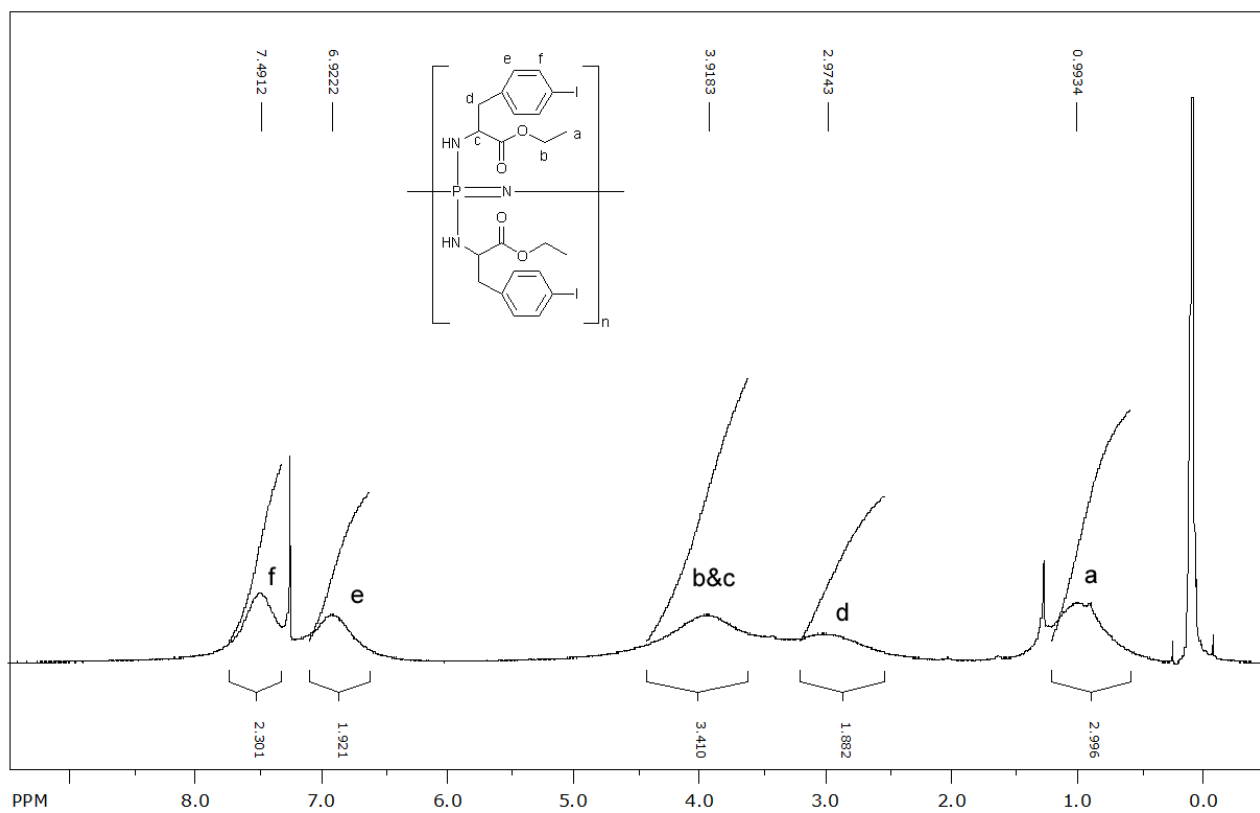

Fig. S5 <sup>1</sup>H NMR spectrum of polymer 15

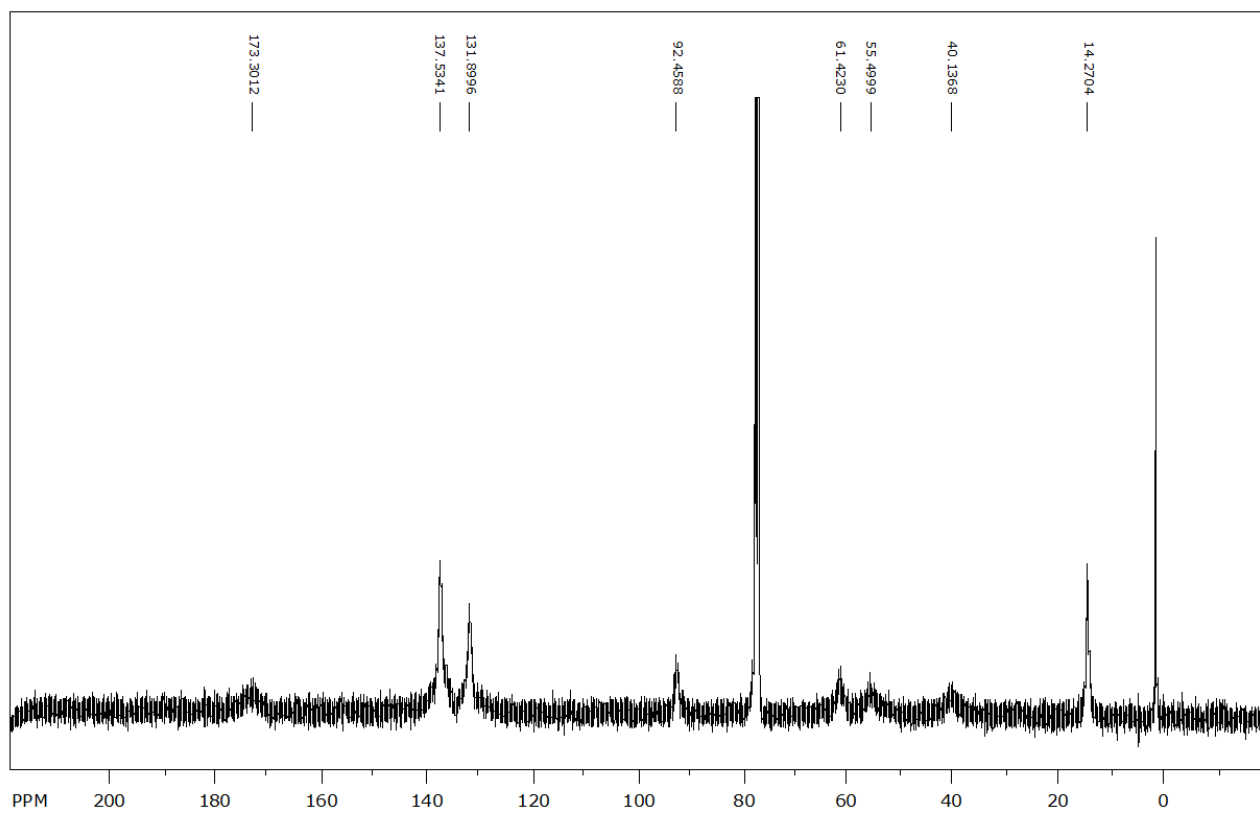

Fig. S6  $^{13}\text{C}$  NMR spectrum of polymer 15
